# Supplementary material
Source: MDPI journal article supplement (https://www.mdpi.com/2076-3263/11/11/455)
Supplement: s1 [file s1]

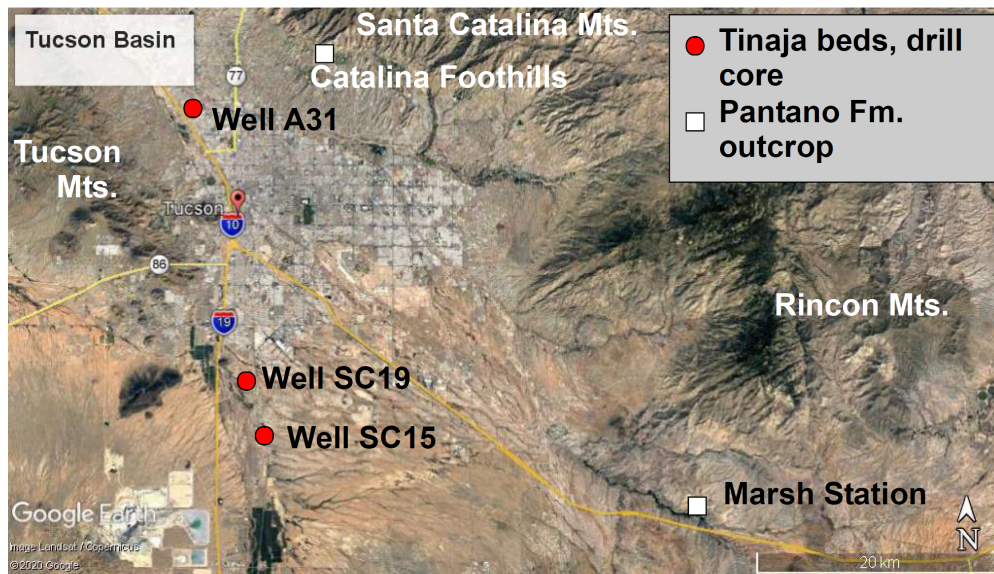

**Figure S1.** Satellite image of Tucson Basin, Arizona, showing sample sites.

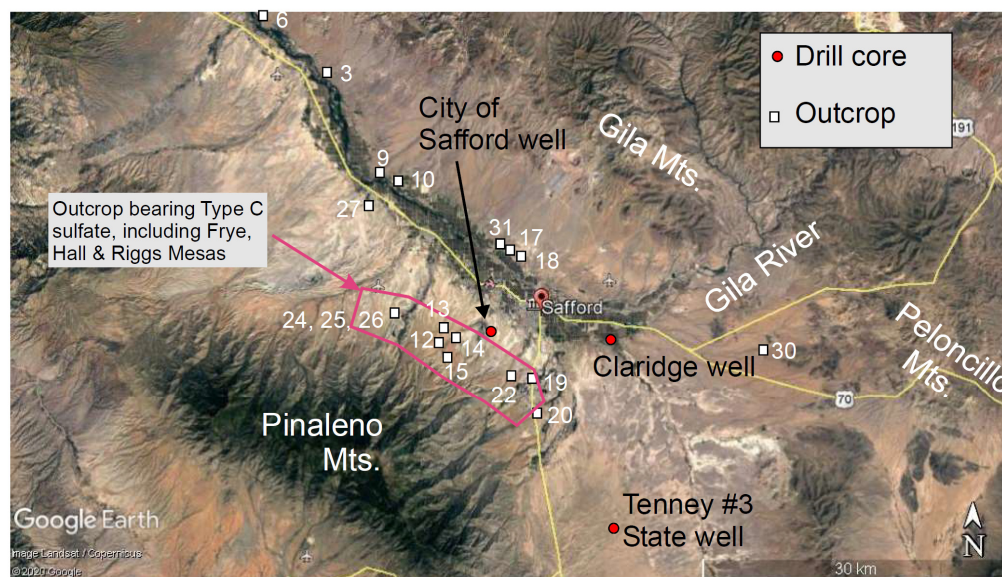

**Figure S2.** Satellite image of Safford Basin, Arizona, showing sample sites.

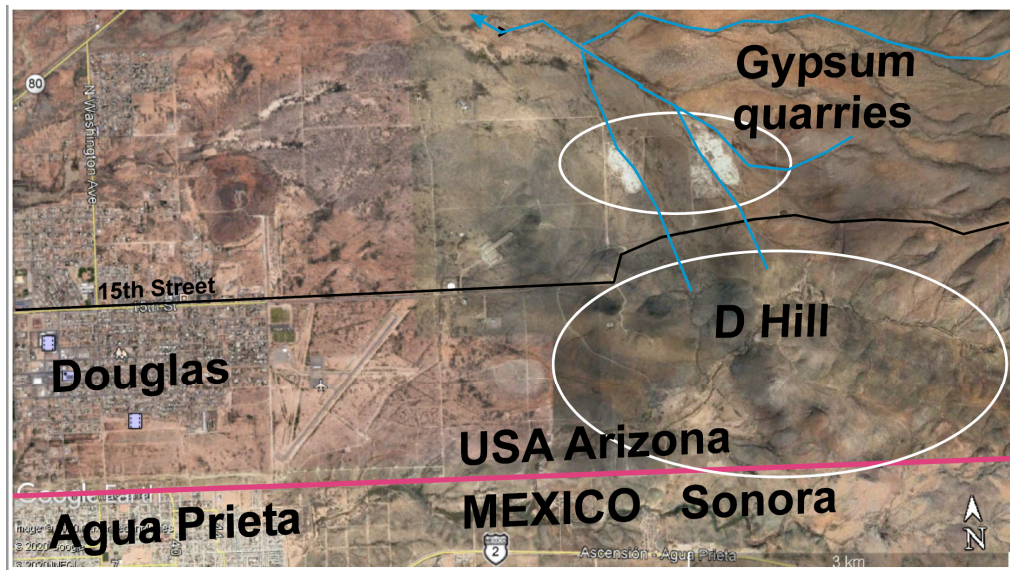

**Figure S3.** Satellite image of an un-named basin east of Douglas, Arizona, showing sample sites.

| Table S1. Sample locations and new isotope data.               |                 |                            |                                          |                                      |
|----------------------------------------------------------------|-----------------|----------------------------|------------------------------------------|--------------------------------------|
| Lab. No.                                                       | Sample location | $\delta^{34}\text{S}$<br>‰ | $\delta^{18}\text{O}_{\text{SO}_4}$<br>‰ | Sample description                   |
| <b><i>Picacho Basin, Exxon State (74)-1 Well</i></b>           |                 |                            |                                          |                                      |
| S-4138                                                         | 762.5-915.0     | 7.8                        | 7.8                                      | massive anhydrite                    |
| S-4139                                                         | 915.0-1067.5    | 5.6                        |                                          | massive anhydrite                    |
| S-4140                                                         | 1067.5-1220.0   | 6.0                        |                                          | massive anhydrite                    |
| S-4141                                                         | 1220.0-1372.5   | 6.4                        |                                          | massive anhydrite                    |
| S-4142                                                         | 1372.5-1525.0   | 9.5                        | 8.4                                      | massive anhydrite                    |
| S-4143                                                         | 1525.0-1677.5   | 7.6                        |                                          | massive anhydrite                    |
| S-4144                                                         | 1677.5-1830.0   | 8.2                        |                                          | massive anhydrite                    |
| S-4145                                                         | 1830.0-1982.5   | 8.9                        |                                          | massive anhydrite                    |
| S-4146                                                         | 1982.5-2135.0   | 7.8                        | 11.8                                     | massive anhydrite                    |
| S-4147                                                         | 2135.0-2287.5   | 8.9                        |                                          | massive anhydrite                    |
| S-4148                                                         | 2287.5-2440.0   | 9.2                        | 14.7                                     | massive anhydrite                    |
| <b><i>Safford Basin, Tenney #3 State Well D(9-27)36cd</i></b>  |                 |                            |                                          |                                      |
| S-4159                                                         | 396.5-457.5     | 13.1                       | 15.2                                     | massive anhydrite                    |
| S-4160                                                         | 547.5-518.5     | 12.4                       |                                          | massive anhydrite                    |
| S-4161                                                         | 518.5-579.5     | 15.0                       |                                          | massive anhydrite                    |
| S-4162                                                         | 579.5-640.5     | 16.2                       | 12.3                                     | massive anhydrite                    |
| S-4163                                                         | 640.5-701.5     | 9.7                        |                                          | massive anhydrite                    |
| S-4164                                                         | 701.5-762.5     | 9.8                        |                                          | massive anhydrite                    |
| S-4165                                                         | 762.5-823.5     | 9.4                        | 8.6                                      | massive anhydrite                    |
| S-4193                                                         | 823.5-884.5     | 8.2                        |                                          | massive anhydrite                    |
| S-4194                                                         | 884.5-945.5     | 8.4                        | 9.4                                      | massive anhydrite                    |
| S-4195                                                         | 945.5-1006.5    | 8.7                        |                                          | massive anhydrite                    |
| S-4196                                                         | 1006.5-1037.0   | 9.2                        | 9.8                                      | massive anhydrite                    |
| <b><i>Safford basin, Claridge Well</i></b>                     |                 |                            |                                          |                                      |
| S-4197                                                         | 329.4-364.5     | 13.6                       | 14.3                                     | massive gypsum                       |
| S-4198                                                         | 364.5-396.5     | 12.9                       |                                          | massive gypsum                       |
| S-4199                                                         | 396.5-428.5     | 12.5                       |                                          | massive gypsum                       |
| S-4200                                                         | 428.5-460.6     | 13.1                       |                                          | massive gypsum                       |
| S-4201                                                         | 460.6-483.4     | 13.3                       |                                          | massive gypsum                       |
| S-4202                                                         | 488.0-523.1     | 11.1                       | 13.5                                     | massive gypsum                       |
| S-4204                                                         | 523.1-555.1     | 11.5                       |                                          | massive gypsum                       |
| S-4205                                                         | 555.1-587.1     | 11.5                       |                                          | massive gypsum                       |
| S-4206                                                         | 587.1-623.7     | 11.6                       |                                          | massive gypsum                       |
| S-4207                                                         | 623.7-655.8     | 12.5                       |                                          | massive gypsum                       |
| S-4208                                                         | 655.8-683.2     | 13.5                       |                                          | massive gypsum                       |
| <b><i>Safford basin, City of Safford well D-7-25-27dad</i></b> |                 |                            |                                          |                                      |
| S-4151                                                         | 95.5-131.5      | -15.8                      | 5.3                                      | massive gypsum                       |
| S-4152                                                         | 131.5-163.8     | -13.9                      |                                          | massive gypsum                       |
| S-4153                                                         | 187.3-231.5     | -18.8                      |                                          | massive gypsum                       |
| S-4155                                                         | 231.5-262.9     | -4.9                       |                                          | massive gypsum                       |
| S-4154                                                         | 262.9-299.2     | -13.5                      |                                          | massive gypsum                       |
| S-4156                                                         | 299.2-331.5     | -13.0                      |                                          | massive gypsum                       |
| S-4158                                                         | 331.5-367.8     | -18.0                      | 3.4                                      | massive gypsum                       |
| <b><i>Safford Basin, outcrop</i></b>                           |                 |                            |                                          |                                      |
| S-3806                                                         | Site 3          | 7.3                        |                                          | silty clay                           |
| S-3807                                                         | Site 6          | 9.1                        |                                          | bitter salt coating pyritic sediment |
| S-3808                                                         | Site 6          | 9.3                        |                                          | bedded gypsum                        |
| S-3810                                                         | Site 8          | 12.8                       |                                          | bedded gypsum                        |
| S-3814                                                         | Site 9          | 8.4                        |                                          | bedded gypsum                        |
| S-3811                                                         | Site 10         | 11.0                       |                                          | bedded gypsum                        |
| S-4338                                                         | Site 12         | 8.2                        |                                          | red sediment, upper                  |
| S-4334                                                         | Site 12         | 6.5                        |                                          | red sediment, lower                  |
| S-4354                                                         | Site 12         | -30.2                      |                                          | ochre                                |
| (none)                                                         | Site 12         | 2.7                        |                                          | sediment                             |
| S-3920                                                         | Site 13         | -27.2                      |                                          | bedded gypsum                        |
| S-3921                                                         | Site 13         | -27.2                      | 3.8                                      | sediment                             |

| Lab. No.                                        | Sample location            | $\delta^{34}\text{S}$ | $\delta^{18}\text{O}_{\text{SO}_4}$ | Sample description                      |
|-------------------------------------------------|----------------------------|-----------------------|-------------------------------------|-----------------------------------------|
|                                                 |                            | ‰                     | ‰                                   |                                         |
| <b><i>Safford Basin, outcrop, continued</i></b> |                            |                       |                                     |                                         |
| S-3922                                          | Site 13                    | -28.2                 |                                     | sediment                                |
| S-3923                                          | Site 13                    | -26.8                 | 4.8                                 | sediment                                |
| S-3924                                          | Site 13                    | -23.7                 |                                     | sediment                                |
| S-3925                                          | Site 13                    | -26.7                 | 2.4                                 | bedded gypsum                           |
| S-3926                                          | Site 13                    | -10.8                 |                                     | bedded gypsum                           |
| S-3927                                          | Site 13                    | -17.0                 | 7.5                                 | sediment                                |
| S-3928                                          | Site 13                    | -22.3                 |                                     | sediment                                |
| S-3929                                          | Site 13                    | -27.2                 | 2.7                                 | sediment                                |
| S-3930                                          | Site 13                    | -18.3                 |                                     | sediment                                |
| S-3932                                          | Site 13                    | -24.9                 |                                     | sediment                                |
| S-3934                                          | Site 13                    | -23.1                 |                                     | sediment                                |
| S-3978                                          | Site 14                    | 4.5                   |                                     | sediment                                |
| S-3979                                          | Site 14                    | 5.4                   |                                     | sediment                                |
| S-3980                                          | Site 14                    | 7.0                   |                                     | sediment                                |
| S-3981                                          | Site 14                    | 3.6                   |                                     | sediment                                |
| S-3812                                          | Site 15                    | -11.0                 |                                     | gypsum vein                             |
| S-3815                                          | Site 15                    | -12.6                 |                                     | clay                                    |
| S-3813                                          | Site 15                    | -12.9                 |                                     | bedded gypsum                           |
| S-3816                                          | Site 15                    | -11.2                 |                                     | ochre                                   |
| S-3818                                          | Site 17                    | 9.5                   |                                     | bedded gypsum                           |
| S-3935                                          | Site 18                    | -21.9                 |                                     | bedded gypsum                           |
| S-3819                                          | Site 19                    | -11.2                 |                                     | sediment                                |
| S-3820                                          | Site 19                    | -7.6                  |                                     | ochre                                   |
| S-3821                                          | Site 19                    | -21.8                 |                                     | bedded gypsum                           |
| S-3474                                          | Site 19                    | -20.9                 |                                     | ochre                                   |
| S-4280                                          | Site 20                    | 6.6                   |                                     | lacustrine sediment                     |
| S-4281                                          | Site 20                    | 6.4                   |                                     | lacustrine sediment                     |
| S-4282                                          | Site 22                    | 3.1                   |                                     | lacustrine sediment (reddish sand.silt) |
| S-4283                                          | Site 24                    | -11.0                 |                                     | rosette gypsum                          |
| S-4266                                          | Site 25                    | 2.5                   |                                     | lake sediment                           |
| S-4267                                          | Site 25                    | 4.0                   |                                     | lake sediment                           |
| S-4284                                          | Site 25                    | 5.1                   |                                     | lake sediment                           |
| (none)                                          | Site 26                    | 4.3                   |                                     | lake sediment (sand+clay layer)         |
| S-4285                                          | Site 26                    | 1.2                   |                                     | bedded gypsum                           |
| S-4268                                          | Site 27                    | -20.9                 |                                     | lake sediment (clay layer)              |
| S-4270                                          | Site 27                    | -28.8                 |                                     | lake sediment (green clay layer)        |
| S-4271                                          | Site 27                    | 5.6                   |                                     | lake sediment (clay layer, salty)       |
| S-4342                                          | Site 27                    | 5.8                   |                                     | lake sediment                           |
| S-4255                                          | Site 30                    | 9.2                   |                                     | bedded gypsum                           |
| S-3984                                          | Site 31                    | 11.2                  |                                     | lake sediment                           |
| S-3488                                          | Site 31                    | 10.2                  | 3.1                                 | lake sediment                           |
| S-3985                                          | Site 31                    | 11.1                  |                                     | lake sediment                           |
| S-4020                                          | Site 31                    | 8.8                   | 10.0                                | lake sediment                           |
| S-3805                                          | Site 31                    | 9.5                   |                                     | lake sediment                           |
| S-4032                                          | Site 31                    | 7.9                   | 10.1                                | lake sediment                           |
| S-4033                                          | Site 31                    | 9.8                   |                                     | lake sediment                           |
| S-4034                                          | Site 31                    | 9.5                   | 12.6                                | lake sediment                           |
| S-4035                                          | Site 31                    | 6.5                   |                                     | lake sediment                           |
| S-4036                                          | Site 31                    | 9.1                   | 7.2                                 | lake sediment                           |
| S-4038                                          | Site 31                    | 8.9                   |                                     | lake sediment                           |
| S-4039                                          | Site 31                    | 6.4                   | 5.7                                 | lake sediment                           |
| <b><i>San Pedro basin</i></b>                   |                            |                       |                                     |                                         |
| S-4359                                          | Gypsum mine, Mammoth       | 8.6                   |                                     | bedded gypsum                           |
| S-4360                                          | Gypsum mine, Mammoth       | 9.0                   | 10.0                                | bedded gypsum                           |
| S-4361                                          | Gypsum mine, Mammoth       | 8.7                   | 11.4                                | bedded gypsum                           |
| S-4371                                          | Gypsum mine, Mammoth       | 8.9                   |                                     | bedded gypsum                           |
| S-4373                                          | Gypsum mine, Mammoth       | 8.4                   | 10.1                                | bedded gypsum                           |
| S-4374                                          | Gypsum mine, Mammoth       | 8.6                   |                                     | bedded gypsum                           |
| S-4372                                          | Gypsum mine, Mammoth       | 9.0                   |                                     | bedded gypsum                           |
| QG                                              | Copper Ck. Road, Mammoth   | 7.6                   | 9.3                                 | bedded gypsum                           |
|                                                 | West of St. David          | 11.1                  | 12.8                                | bedded gypsum                           |
| S-17472                                         | Threelinks Ranch, Cascabel | 10.8                  | 10.0                                | Na sulfates in lacustrine clay          |
| S17914                                          | Teran Wash, Cascabel       | 16.0                  | 14.0                                | bedded gypsum, recrystallized           |
| S17915                                          | Teran Wash, Cascabel       | 17.1                  | 16.8                                | bedded gypsum, recrystallized           |
| S17916                                          | Teran Wash, Cascabel       | 15.8                  | 14                                  | bedded gypsum, recrystallized           |



| Lab. No.                                                                                                                                                                                           | Sample location                       | $\delta^{34}\text{S}$<br>‰ | $\delta^{18}\text{O}_{\text{SO}_4}$<br>‰ | Sample description   |
|----------------------------------------------------------------------------------------------------------------------------------------------------------------------------------------------------|---------------------------------------|----------------------------|------------------------------------------|----------------------|
| <b><i>Tucson Basin -- Pantano Formation</i></b>                                                                                                                                                    |                                       |                            |                                          |                      |
| S-3740                                                                                                                                                                                             | Marsh Station Rd.                     | 12.0                       | 15.0                                     | bedded gypsum        |
| S-3741                                                                                                                                                                                             | Marsh Station Rd.                     | 11.3                       | 15.6                                     | gypsum vein          |
| S-3889                                                                                                                                                                                             | Marsh Station Rd.                     | 12.6                       | 17.8                                     | bedded gypsum        |
| S-3742                                                                                                                                                                                             | Marsh Station Rd.                     | 12.1                       | 13.9                                     | bedded gypsum        |
| S-3891                                                                                                                                                                                             | Marsh Station Rd.                     | 12.1                       | 14.5                                     | gypsum vein          |
| S-3892                                                                                                                                                                                             | Marsh Station Rd.                     | 9.3                        | 12.2                                     | gypsiferous clay     |
| S-3890                                                                                                                                                                                             | Marsh Station Rd.                     | 6.4                        | 14.3                                     | bedded gypsum        |
| S-3743                                                                                                                                                                                             | Marsh Station Rd.                     | 9.1                        | 12.7                                     | gypsum vein          |
| Cat-1                                                                                                                                                                                              | Catalina foothills, N Campbell Ave.   | 6.9                        | 12.0                                     | bedded gypsum        |
| Cat-2                                                                                                                                                                                              | Catalina foothills, N Campbell Ave.   | 6.8                        | 12.9                                     | bedded gypsum        |
| Cat-3                                                                                                                                                                                              | Catalina foothills, N Campbell Ave.   | 8.4                        | 12.6                                     | bedded gypsum        |
| <b><i>Tucson Basin, Tinaja Beds, Tucson Water well SC19</i></b>                                                                                                                                    |                                       |                            |                                          |                      |
| SC-19-1                                                                                                                                                                                            | 472.8-475.8                           | 6.2                        |                                          | massive gypsum       |
| SC-19-2                                                                                                                                                                                            | 533.8-536.8                           | 7.6                        | 8.5                                      | massive gypsum       |
| SC-19-3                                                                                                                                                                                            | 625.3-628.3                           | 6.0                        |                                          | massive gypsum       |
| SC-19-4                                                                                                                                                                                            | 747.3-750.3                           | 5.6                        | 7.0                                      | massive gypsum       |
| <b><i>Tucson Basin, Tinaja Beds, Tucson Water well SC15</i></b>                                                                                                                                    |                                       |                            |                                          |                      |
| SC-15-1                                                                                                                                                                                            | 244.0-247.0                           | 6.1                        | 7.3                                      | massive gypsum       |
| SC-15-2                                                                                                                                                                                            | 305.0-308.1                           | 6.0                        |                                          | massive gypsum       |
| SC-15-3                                                                                                                                                                                            | 366.0-384.3                           | 8.2                        | 7.4                                      | massive anhydrite    |
| SC-15-4                                                                                                                                                                                            | 457.5-475.8                           | 7.5                        |                                          | massive anhydrite    |
| SC-15-5                                                                                                                                                                                            | 518.5-536.8                           | 8.4                        | 9.3                                      | massive anhydrite    |
| <b><i>Tucson Basin, Tinaja Beds, Tucson Water well A31</i></b>                                                                                                                                     |                                       |                            |                                          |                      |
| A-31-1                                                                                                                                                                                             | 262.3-265.4                           | 5.9                        | 10.5                                     | massive gypsum       |
| A-31-2                                                                                                                                                                                             | 280.6-283.7                           | 7.4                        |                                          | massive gypsum       |
| A-31-3                                                                                                                                                                                             | 295.9-298.9                           | 5.8                        |                                          | massive gypsum       |
| A-31-4                                                                                                                                                                                             | 308.1-311.1                           | 6.4                        | 11.4                                     | massive gypsum       |
| <b><i>Unnamed basin (Douglas)</i></b>                                                                                                                                                              |                                       |                            |                                          |                      |
| S-3887                                                                                                                                                                                             | Gypsum mine                           | 19.6                       |                                          | massive gypsum       |
| S-3888                                                                                                                                                                                             | Gypsum mine                           | 21.8                       | 16.4                                     | massive gypsum       |
| S-4340                                                                                                                                                                                             | Gypsum mine                           | 21.0                       | 17.4                                     | massive gypsum       |
| S-4341                                                                                                                                                                                             | Gypsum mine                           | 20.8                       | 18.5                                     | massive gypsum       |
| S-3894                                                                                                                                                                                             | Limestone, D Hill                     | 21.2                       |                                          | pyrite               |
| S-3895                                                                                                                                                                                             | Limestone, D Hill                     | 3.8                        |                                          | pyrite               |
| S-3896                                                                                                                                                                                             | Limestone, D Hill                     | 10.9                       |                                          | pyrite               |
| Sed-1                                                                                                                                                                                              | Small drainage, D Hiill               | 15.5                       | 3.3                                      | Acid-soluble sulfate |
| Sed-2                                                                                                                                                                                              | Small drainage, D Hiill               | 16.3                       | 11.6                                     | Acid-soluble sulfate |
| Sed-3                                                                                                                                                                                              | Small drainage, D Hiill               | 16.8                       | 10.2                                     | Acid-soluble sulfate |
| <b><i>Miscellaneous</i></b>                                                                                                                                                                        |                                       |                            |                                          |                      |
|                                                                                                                                                                                                    | Willcox Playa, Arizona                | 5.4                        |                                          | dissolved sulfate    |
|                                                                                                                                                                                                    | Animas Playa, New Mexico              | 4.6                        |                                          | dissolved sulfate    |
|                                                                                                                                                                                                    | Playa Guzman, Chihuahua               | 7.3                        |                                          | dissolved sulfate    |
|                                                                                                                                                                                                    | Salton Sea, California                | 5.6                        |                                          | dissolved sulfate    |
|                                                                                                                                                                                                    | White Sands, New Mexico               | 12.6                       |                                          | gypsum dune sand     |
|                                                                                                                                                                                                    | Fort Quitman (Fort Hancock Formation) | 5.9                        |                                          | massive gypsum       |
|                                                                                                                                                                                                    | Fort Quitman (Fort Hancock Formation) | 7.4                        |                                          | massive gypsum       |
| Notes: Analytical precisions (1 $\sigma$ ) are 0.13‰ for $\delta^{34}\text{S}$ , and 0.4‰ for $\delta^{18}\text{O}$ , except for numbers in red font, for which the analytical precision was 0.9‰. |                                       |                            |                                          |                      |
